# Supplementary material
Source: Royal Society of Chemistry journal article supplement (doi:10.1039/d6ma00386a)

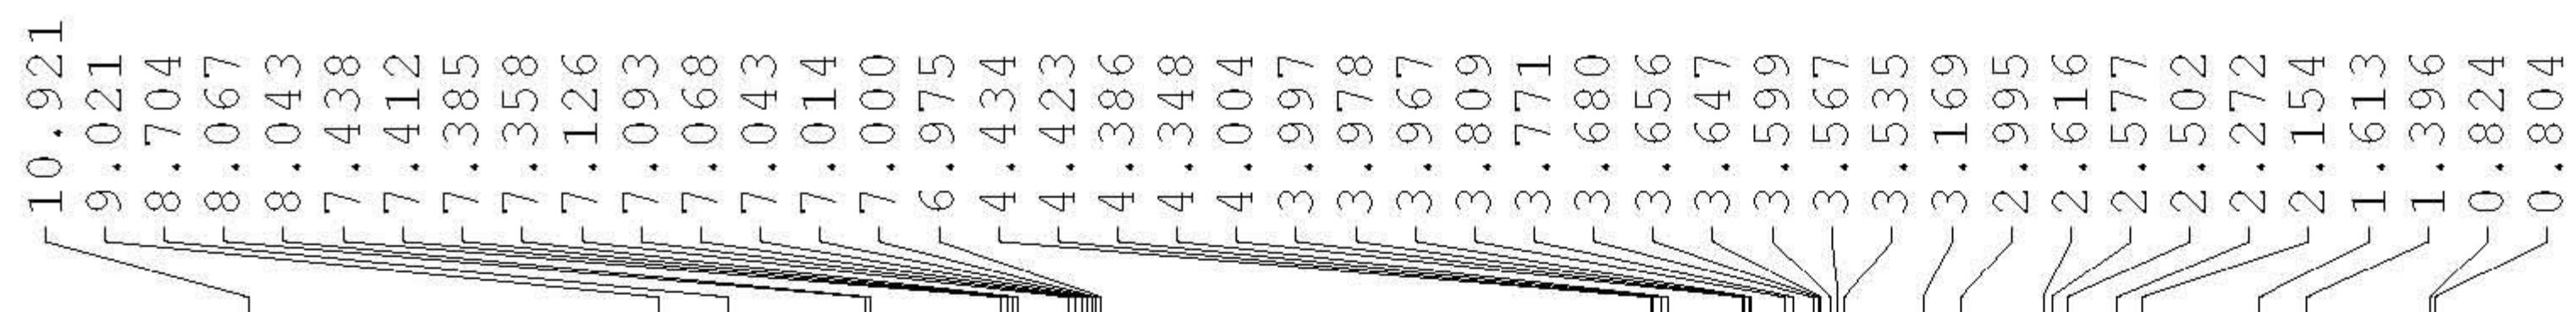

NAME 11  
EXPNO 3  
PROCNO 1  
Date\_ 20190621  
Time 19.54  
INSTRUM spect  
PROBHD 5 mm PABBO BB-  
PULPROG zg30  
TD 16384  
SOLVENT DMSO  
NS 618  
DS 0  
SWH 6188.119 Hz  
FIDRES 0.377693 Hz  
AQ 1.3238772 sec  
RG 203  
DW 80.800 usec  
DE 6.50 usec  
TE 295.1 K  
D1 1.00000000 sec  
TD0 1

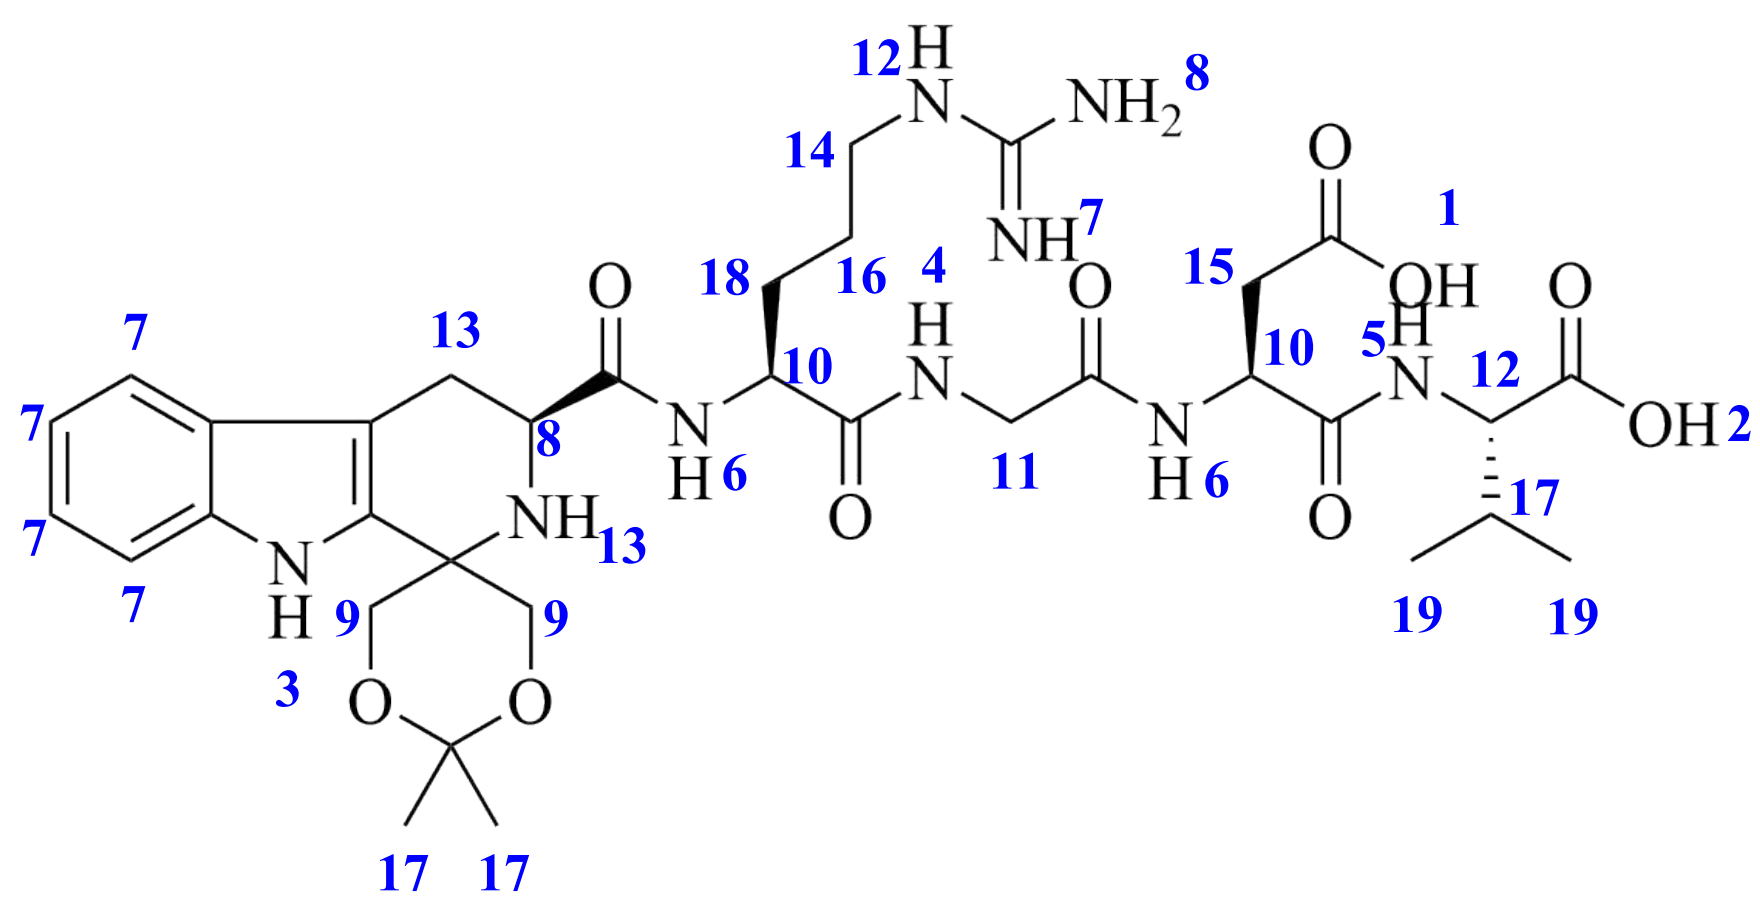

==== CHANNEL f1 =====  
NUC1 1H  
P1 12.16 usec  
PL1 0.00 dB  
PL1W 11.05230045 W  
SF01 300.1318534 MHz  
SI 32768  
SF 300.1300000 MHz  
WDW EM  
SSB 0  
LB 0.30 Hz  
GB 0  
PC 1.00

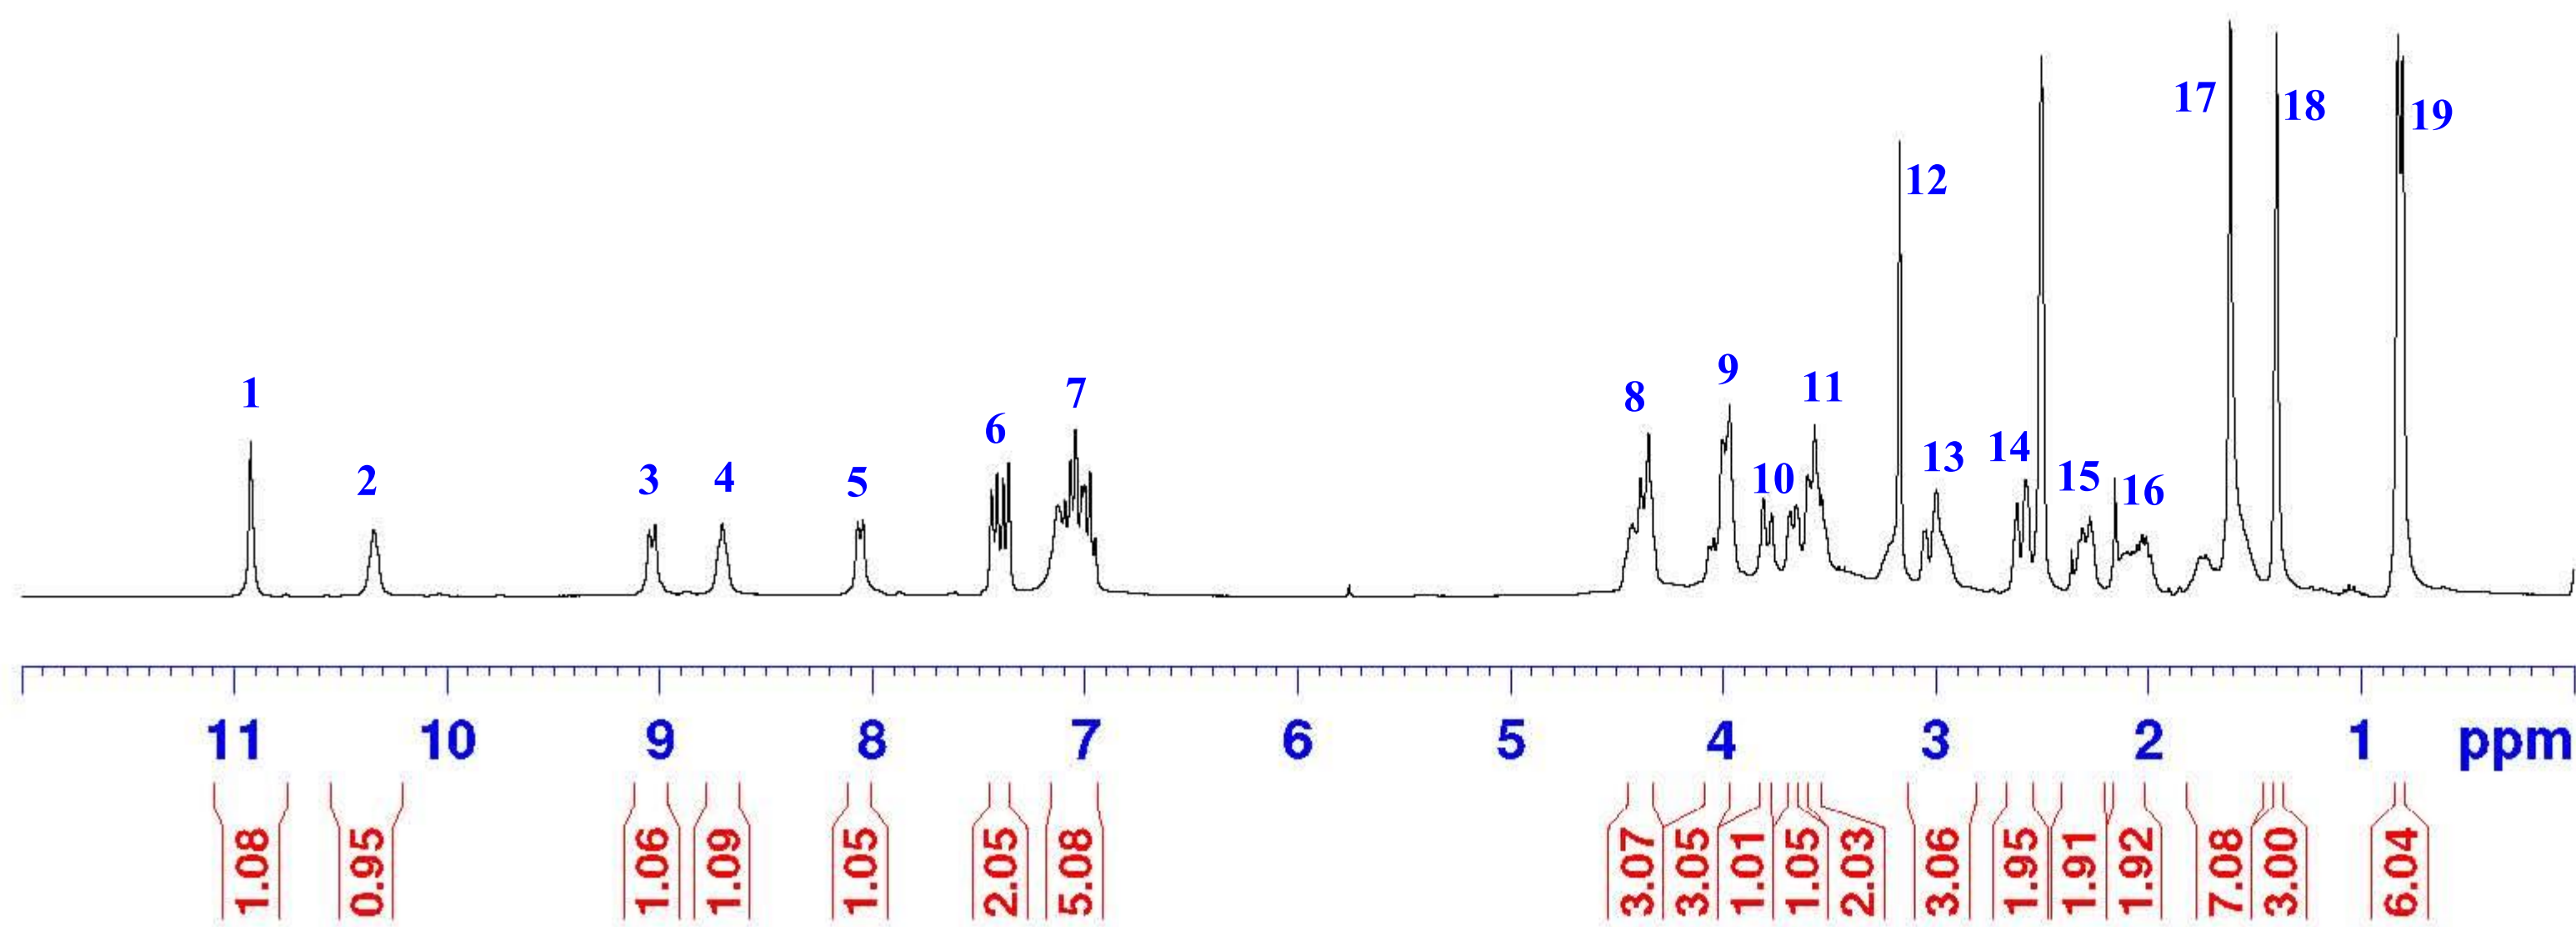

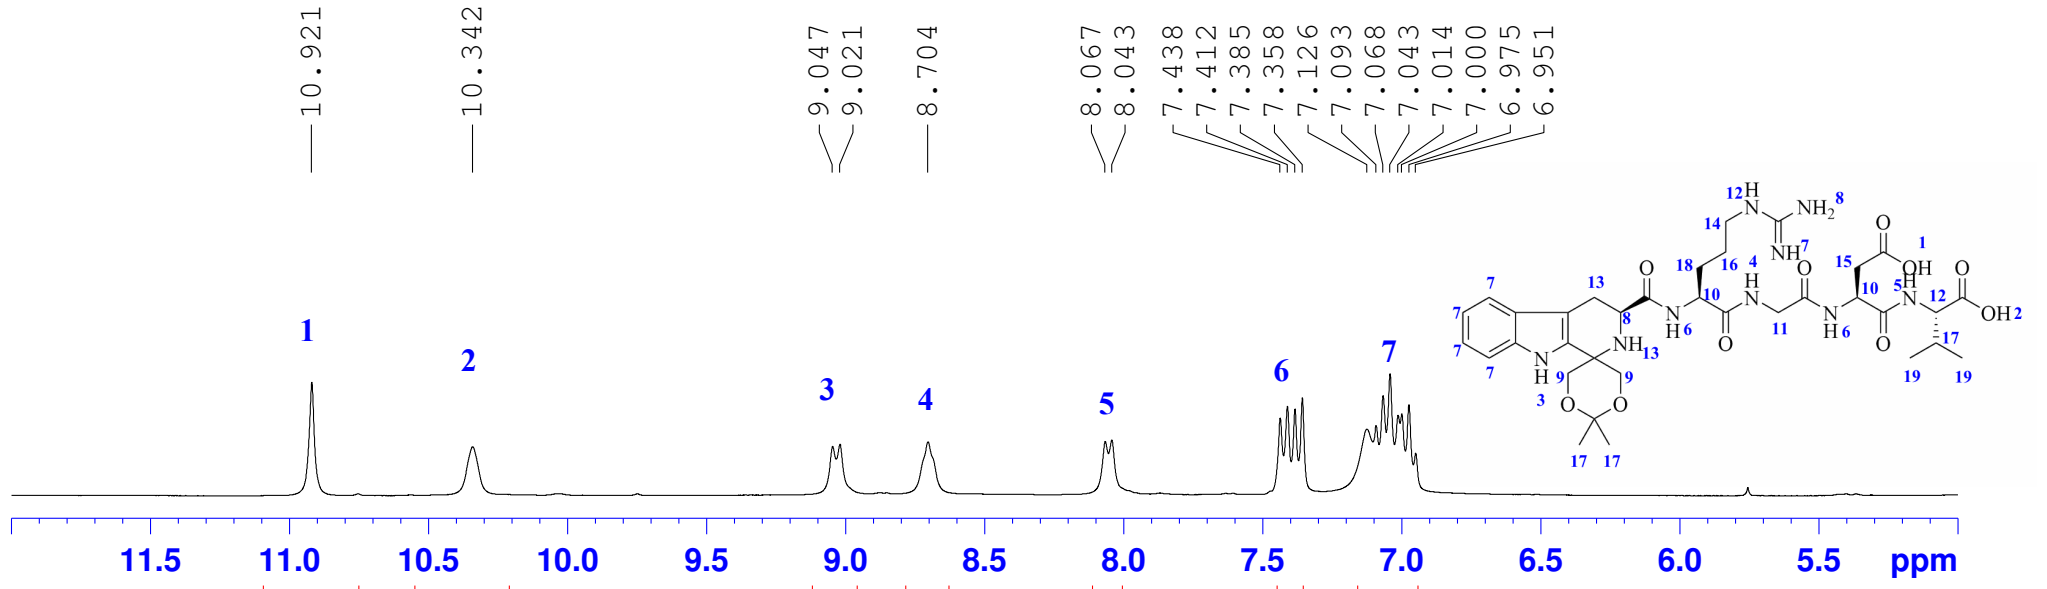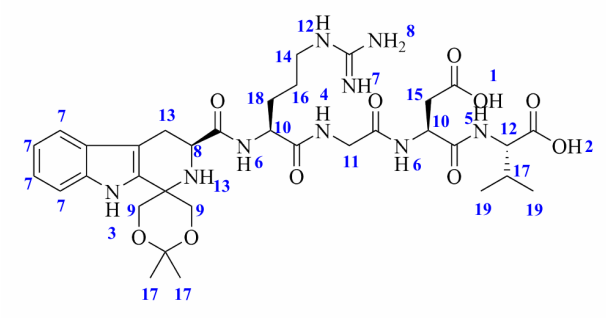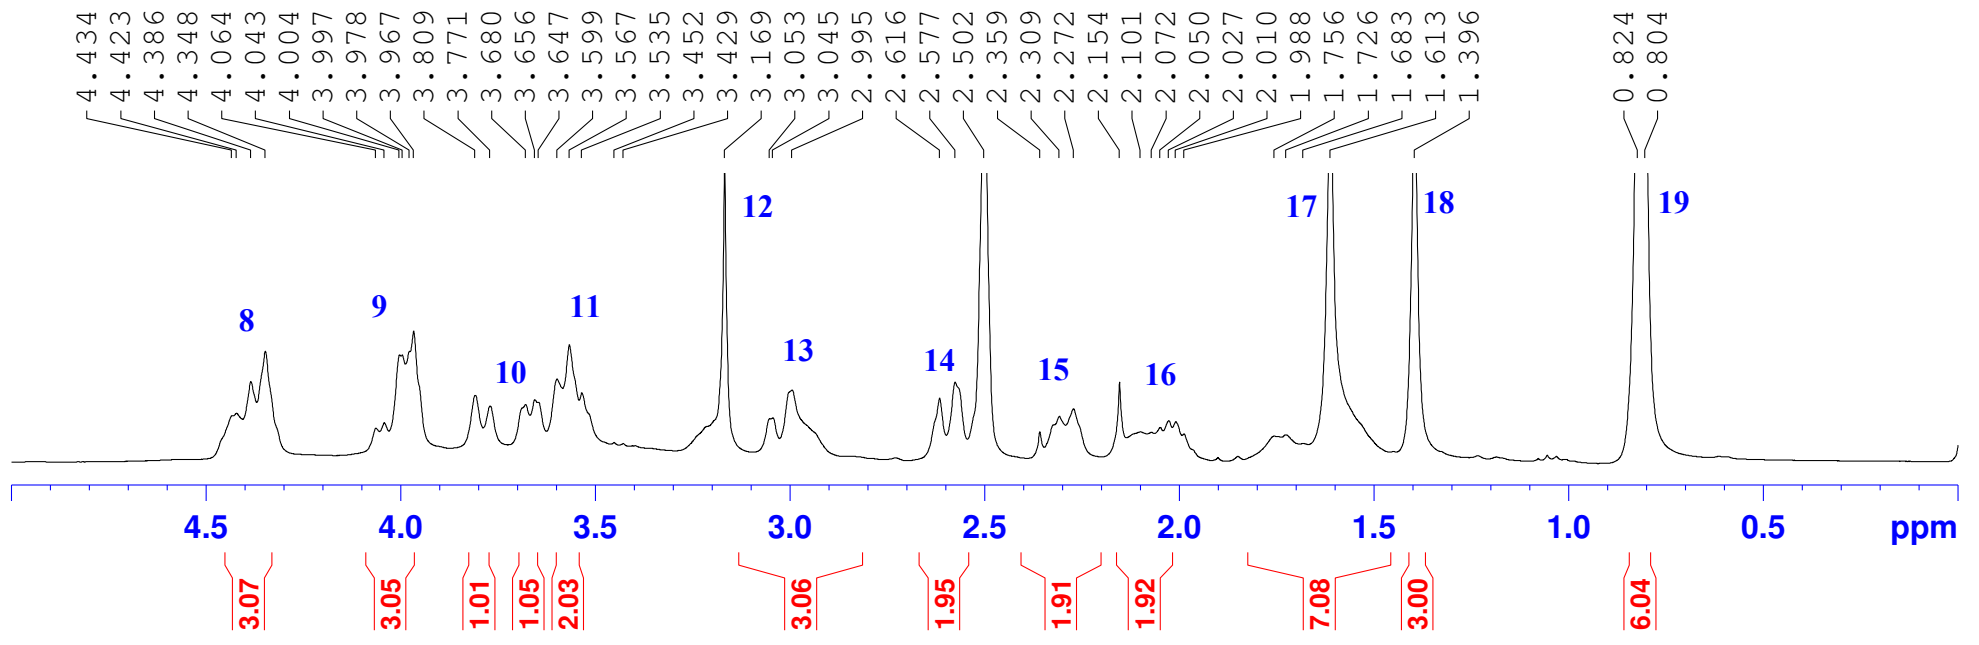

Supplement: d6ma00386a1.pdf [file d6ma00386a1.pdf]
